# Supplementary material for: Co-construction of the family-focused support conversation: a participatory learning and action research study to implement support for family members whose relatives are being discharged for end-of-life care at home or in a nursing home
Source: Springer Nature journal article supplement (doi:10.1186/s12904-020-00647-5), 2020-09-21
Supplement: MOESM2 [file 18400840]

## Supplementary information 2: evidence review

| Contents                                                          | Page |
|-------------------------------------------------------------------|------|
| 1: Systematic reviews identified                                  |      |
| 1a: Identified by Thomas et al (2017) in meta-review              | 2    |
| 1b: Identified in literature search                               | 3    |
| 2. Systematic reviews consulted                                   | 4    |
| 3. Summary of studies identified from systematic reviews          | 7    |
| 4. Detailed summary of studies included in each systematic review | 11   |
| Northouse et al 2010                                              | 11   |
| Regan et al 2012                                                  | 14   |
| Waldron et al 2013                                                | 17   |
| Candy et al 2011                                                  | 18   |
| Nevis 2014                                                        | 19   |
| Harding et al 2012                                                | 20   |
| Chambers et al 2011                                               | 23   |
| Caress et al 2009                                                 | 24   |
| Ussher et al 2009                                                 | 26   |
| Glasdam et al 2010                                                | 28   |
| Hudson et al 2010                                                 | 31   |
| 6. Analysis of FOCUS and COPE from intervention manuals           | 33   |
| 5. Analysis of included studies                                   | 36   |

**1a) Systematic reviews Identified in meta-review by Thomas et al (2017)**

| <b>Reviews considered good methodological quality by Thomas et al (2017)*</b>           |                                                                                                                        |
|-----------------------------------------------------------------------------------------|------------------------------------------------------------------------------------------------------------------------|
| <b>Systematic reviews focused on interventions for caregivers of people with cancer</b> | <b>Systematic reviews focused on interventions for caregivers of people at the end of life with various conditions</b> |
| Lang and Lim (2014)                                                                     | Candy et al (2011)                                                                                                     |
| Northouse et al (2010)                                                                  | Gomes et al (2014)                                                                                                     |
| Regan et al (2012)                                                                      | Nevis (2014)                                                                                                           |
| Waldron et al (2013)                                                                    |                                                                                                                        |
|                                                                                         |                                                                                                                        |
| <b>Reviews considered of medium methodological quality by Thomas et al (2017)</b>       |                                                                                                                        |
| Harding et al (2012)                                                                    | Glasdam et al (2010)                                                                                                   |
| Chambers et al (2011)                                                                   | Hudson et al (2010)                                                                                                    |
| Caress et al (2009)                                                                     | Loi et al (2014)                                                                                                       |
| Ussher et al (2009)                                                                     | Pottie et al (2014)                                                                                                    |
| Gauthier and Gagliese (2012)                                                            | Walczak et al (2014)                                                                                                   |
| Kaltenbaugh et al (2015)                                                                |                                                                                                                        |

\*Thomas et al (2014) graded the systematic views using the criteria in the box below:

Is there a well-defined question?  
 Is there a defined search strategy?  
 Are inclusion/exclusion criteria stated?  
 Are study designs and number of studies clearly stated?  
 Have the primary studies been quality assessed?  
 Have the studies been appropriately synthesised?  
 Has more than one person been involved at each stage of the review process? The criteria were scored as follows: yes=1; in part=0.5; no or not stated=0.  
 High scoring reviews (i.e. those reviews that scored 4 and over) went forward for full data extraction for the meta-review. Only brief summary information was extracted from reviews of lower quality (i.e. those scoring less than 4).

**1b Systematic reviews identified from search**

| Search details                                                                                                                                                                                                                         | CINHAL plus      | Medline          | APA<br>PsycINFO | Totals                                                                |
|----------------------------------------------------------------------------------------------------------------------------------------------------------------------------------------------------------------------------------------|------------------|------------------|-----------------|-----------------------------------------------------------------------|
| Search terms<br>Systematic or meta-analysis or literature review +<br>End of life care or palliative care or death or dying or terminally ill +<br>Caregivers or family members or relatives or informal caregivers +<br>Interventions | n=32             | n=68             | n=0             |                                                                       |
| Limiters                                                                                                                                                                                                                               |                  |                  |                 |                                                                       |
| Publication after January 2016 (since Thomas et al meta-review search)<br>All adults<br>Peer reviewed<br>Abstract available                                                                                                            |                  |                  |                 |                                                                       |
| Systematic reviews identified as potentially relevant                                                                                                                                                                                  | n=1 <sup>a</sup> | n=1 <sup>b</sup> |                 | n=2<br>Jaffray et al 2016 <sup>a</sup><br>Lui et al 2018 <sup>b</sup> |

## 2. Systematic reviews searched for studies to review

| Review                 | Focus of review                                                                                     | No of studies included in review | Review searched? | Justification of inclusion/exclusion                                                                                | Number of studies identified for analysis |
|------------------------|-----------------------------------------------------------------------------------------------------|----------------------------------|------------------|---------------------------------------------------------------------------------------------------------------------|-------------------------------------------|
| Lang and Lim (2014)    | Systematic review of the effects of art therapy for family caregivers of cancer patients            | N=2                              | No               | Studies focused on art therapy                                                                                      | 0                                         |
| Northouse et al (2010) | Meta-analysis of RCTs of interventions for family caregivers with cancer 1983-2009                  | N=29                             | Yes              | Although focused on cancer, some of the studies related to end of life care                                         | 6                                         |
| Regan et al (2012)     | Systematic review of couple-based interventions for cancer                                          | N=23                             | Yes              | Although focused on couples' therapy and cancer, some papers included people at the end of life in the study sample | 3                                         |
| Waldron et al (2013)   | Systematic review of RCTs psychosocial interventions where at least one outcome was QOL             | N=6                              | Yes              | Although focused on cancer, some of the included papers were related to palliative and end of life care             | 4                                         |
| Candy et al (2011)     | Systematic review of RCT of interventions to support friend or relative in terminal illness         | N=11                             | Yes              | Reasons for excluding n=6 studies p18                                                                               | 5                                         |
| Gomes et al (2014)     | Systematic review of palliative care home care                                                      | N=23                             | No               | Focus of review on palliative care home care vs usual care.                                                         | 0                                         |
| Nevis (2014)           | Evidenced based review of educational interventions in palliative care                              | N=6                              | Yes              | Reasons for excluding n=4 studies p19                                                                               | 2                                         |
| Harding et al (2012)   | Updated systematic review of how informal caregivers in cancer and palliative care can be supported | N=33                             | Yes              | Reasons for excluding n=29 studies p20                                                                              | 4                                         |
| Chambers et al (2011)  | Systematic review of psychosocial interventions for men with prostate cancer and their partners     | N=21                             | Yes              | Studies included to address caregiver support reviewed n=5 see p21                                                  | 2                                         |

|                              |                                                                                                                                               |      |     |                                                                                                                                                                                                                                                                     |   |
|------------------------------|-----------------------------------------------------------------------------------------------------------------------------------------------|------|-----|---------------------------------------------------------------------------------------------------------------------------------------------------------------------------------------------------------------------------------------------------------------------|---|
| Caress et al (2009)          | Narrative review of interventions to support family carers who provide physical care to family members with cancer                            | N=19 | Yes | Authors included studies which were not exclusively focused on physical care, so their papers included in their review were assessed for relevance to end of life care family support. The n=10 papers identified as focused on managing symptoms were not reviewed | 4 |
| Ussher et al (2009)          | Systematic review of psychosocial interventions for informal carers of cancer patients                                                        | N=23 | Yes | Studies graded as weak evidence not reviewed (n=6) – p26                                                                                                                                                                                                            | 3 |
| Gauthier and Gagliese (2012) | Systematic review of bereavement interventions, end of life cancer care and spousal well-being                                                |      | No  | Focused on bereavement interventions and outcomes                                                                                                                                                                                                                   |   |
| Kaltenbaugh et al (2015)     | Systematic review of web-based interventions to support caregivers of patients with cancer                                                    |      | No  | Focused on web-based interventions                                                                                                                                                                                                                                  |   |
| Glasdam et al (2010)         | Systematic review of interventions developed for carers of people with cancer, stroke, diabetes, cardiovascular disease.                      | N=32 | Yes | Reasons for excluding n=31 studies p28                                                                                                                                                                                                                              | 1 |
| Hudson et al 2010            | Systematic review of psychosocial interventions for family carers of palliative care patients                                                 | N=13 | Yes | Reasons for excluding n=12 studies p31                                                                                                                                                                                                                              | 3 |
| Loi et al 2014               | Systematic review of the psychological impact of physical activity on caregivers                                                              |      | No  | Focused on physical activity                                                                                                                                                                                                                                        |   |
| Pottie et al 2014            | Synthesis of 58 papers reporting caregivers' satisfaction with hospice services and impact of services on caregivers psychological well-being |      | No  | Focused on hospice services                                                                                                                                                                                                                                         |   |
| Walczak et al 2014           | Systematic review of end of life communication interventions – focus on communication about diagnosis and                                     |      | No  | Focused on communication of diagnosis and prognosis                                                                                                                                                                                                                 |   |

|                                                                                                                    |                                                                                                |                    |    |                                                                                                                                                                                                                |                |
|--------------------------------------------------------------------------------------------------------------------|------------------------------------------------------------------------------------------------|--------------------|----|----------------------------------------------------------------------------------------------------------------------------------------------------------------------------------------------------------------|----------------|
|                                                                                                                    | prognosis and on changing an aspect of communication                                           |                    |    |                                                                                                                                                                                                                |                |
| Applebaum and Breitbart 2013                                                                                       | Systematic review to determine state of science of interventions for cancer caregivers         | N=49 interventions | No | Focused on intervention design. All studies reviewed by authors included in other reviews apart from Bowman et al 2009, which was excluded from this evidence review because study outcomes were not reported. |                |
| Jaffray et al 2016                                                                                                 | Systematic review of effectiveness of mindfulness for caregivers in palliative care            |                    | No | Focused on mindfulness                                                                                                                                                                                         |                |
| Liu et al 2018                                                                                                     | Systematic review of mindfulness-based stress reduction for caregivers of people with dementia |                    | No | Focused on mindfulness                                                                                                                                                                                         |                |
| Total number of reviews mined for relevant studies<br>Number of papers reviewed identified from systematic reviews |                                                                                                | 11<br>103          |    | Number of studies identified for analysis<br>After duplications removed                                                                                                                                        | 37<br><b>7</b> |

### 3. Summary of papers included in evidence review

| Study                        | Included | Excluded | Reason for exclusion |                     |                       |                     |                                 |                          |             |
|------------------------------|----------|----------|----------------------|---------------------|-----------------------|---------------------|---------------------------------|--------------------------|-------------|
|                              |          |          | Weak evidence        | Focus not caregiver | Focus not end of life | Focus symptom mgmt. | Psycho-therapeutic intervention | Focus service evaluation | Other focus |
| <b>n=103</b>                 |          |          |                      |                     |                       |                     |                                 |                          |             |
| Addington-Hall et al 1992    |          |          |                      |                     |                       |                     |                                 |                          |             |
| Allen et al 2008             |          |          |                      |                     |                       |                     |                                 |                          |             |
| Anderson et al 2000          |          |          |                      |                     |                       |                     |                                 |                          |             |
| Arnaert 2010                 |          |          |                      |                     |                       |                     |                                 |                          |             |
| Badger et al 2007            |          |          |                      |                     |                       |                     |                                 |                          |             |
| Badger et al 2010            |          |          |                      |                     |                       |                     |                                 |                          |             |
| Barrett et al 2009           |          |          |                      |                     |                       |                     |                                 |                          |             |
| Baucom 2009                  |          |          |                      |                     |                       |                     |                                 |                          |             |
| Bakitas et al 2009           |          |          |                      |                     |                       |                     |                                 |                          |             |
| Blanchard et al 1996         |          |          |                      |                     |                       |                     |                                 |                          |             |
| Budin et al 2008             |          |          |                      |                     |                       |                     |                                 |                          |             |
| Bull et al 2000              |          |          |                      |                     |                       |                     |                                 |                          |             |
| Bultz et al 2000             |          |          |                      |                     |                       |                     |                                 |                          |             |
| Campbell et al 2007          |          |          |                      |                     |                       |                     |                                 |                          |             |
| Cameron et al 2004           |          |          |                      |                     |                       |                     |                                 |                          |             |
| Canada et al 2005            |          |          |                      |                     |                       |                     |                                 |                          |             |
| Carter 2006                  |          |          |                      |                     |                       |                     |                                 |                          |             |
| Christensen 1983             |          |          |                      |                     |                       |                     |                                 |                          |             |
| Christakis and Iwashyna 2003 |          |          |                      |                     |                       |                     |                                 |                          |             |
| Clark et al 2003             |          |          |                      |                     |                       |                     |                                 |                          |             |
| Clark et al 2006             |          |          |                      |                     |                       |                     |                                 |                          |             |
| Clayton et al 2007           |          |          |                      |                     |                       |                     |                                 |                          |             |
| Cohen and Kuten 2006         |          |          |                      |                     |                       |                     |                                 |                          |             |
| Curtis et al 2011            |          |          |                      |                     |                       |                     |                                 |                          |             |

|                         |  |  |  |  |  |  |  |  |  |
|-------------------------|--|--|--|--|--|--|--|--|--|
| Curtis et al 2013       |  |  |  |  |  |  |  |  |  |
| Dennis et al 1997       |  |  |  |  |  |  |  |  |  |
| Derdiarain 1989         |  |  |  |  |  |  |  |  |  |
| Dobrof et al 2006       |  |  |  |  |  |  |  |  |  |
| Donnolly et al 2000     |  |  |  |  |  |  |  |  |  |
| Duggleby et al 2007     |  |  |  |  |  |  |  |  |  |
| Gagnon et al 2002       |  |  |  |  |  |  |  |  |  |
| Giarelli 2003           |  |  |  |  |  |  |  |  |  |
| Given 2006              |  |  |  |  |  |  |  |  |  |
| Goldberg et al 1997     |  |  |  |  |  |  |  |  |  |
| Goldberg and Wool 1985  |  |  |  |  |  |  |  |  |  |
| Grande et al 2004       |  |  |  |  |  |  |  |  |  |
| Grant 1999              |  |  |  |  |  |  |  |  |  |
| Haley 2008              |  |  |  |  |  |  |  |  |  |
| Harding et al 2004      |  |  |  |  |  |  |  |  |  |
| Heinrich and Schag 1985 |  |  |  |  |  |  |  |  |  |
| Hendrix et al 2009      |  |  |  |  |  |  |  |  |  |
| Hoff and Haaga 2005     |  |  |  |  |  |  |  |  |  |
| Holmquist et al 2000    |  |  |  |  |  |  |  |  |  |
| Hudson et al 2005       |  |  |  |  |  |  |  |  |  |
| Hudson et al 2008       |  |  |  |  |  |  |  |  |  |
| Hudson et al 2009       |  |  |  |  |  |  |  |  |  |
| Jepson 1999             |  |  |  |  |  |  |  |  |  |
| Kane 1984               |  |  |  |  |  |  |  |  |  |
| Kayser et al 2010       |  |  |  |  |  |  |  |  |  |
| Keefe et al             |  |  |  |  |  |  |  |  |  |
| Kirk and Collins 2006   |  |  |  |  |  |  |  |  |  |
| Kissane et al 2006      |  |  |  |  |  |  |  |  |  |
| Kotila et al 1998       |  |  |  |  |  |  |  |  |  |
| Kozachik et al 2001     |  |  |  |  |  |  |  |  |  |
| Kuijer 2004             |  |  |  |  |  |  |  |  |  |
| Kurtz et al 2005        |  |  |  |  |  |  |  |  |  |



|                            |  |  |  |  |  |  |  |  |  |
|----------------------------|--|--|--|--|--|--|--|--|--|
| Kusajima 2009              |  |  |  |  |  |  |  |  |  |
| Kwak et al 2007            |  |  |  |  |  |  |  |  |  |
| Lincoln et al 2003         |  |  |  |  |  |  |  |  |  |
| Lin et al 2006             |  |  |  |  |  |  |  |  |  |
| McCorkle 1998              |  |  |  |  |  |  |  |  |  |
| McCorkle 2007              |  |  |  |  |  |  |  |  |  |
| McDonald et al 2006        |  |  |  |  |  |  |  |  |  |
| McKinney et al 2002        |  |  |  |  |  |  |  |  |  |
| McLean et al 2008          |  |  |  |  |  |  |  |  |  |
| McLean et al 2011          |  |  |  |  |  |  |  |  |  |
| McLaughlin et al 2007      |  |  |  |  |  |  |  |  |  |
| McMillan et al 2006        |  |  |  |  |  |  |  |  |  |
| McMillan and Small 2007    |  |  |  |  |  |  |  |  |  |
| Magill 2009                |  |  |  |  |  |  |  |  |  |
| Mahler and Kulik 2002      |  |  |  |  |  |  |  |  |  |
| Manne 2004                 |  |  |  |  |  |  |  |  |  |
| Mann and Badr 2008         |  |  |  |  |  |  |  |  |  |
| Mant et al 1998            |  |  |  |  |  |  |  |  |  |
| Meyers et al 2011          |  |  |  |  |  |  |  |  |  |
| Milberg et al 2005         |  |  |  |  |  |  |  |  |  |
| Mokuau 2008                |  |  |  |  |  |  |  |  |  |
| Mohr et al 2003            |  |  |  |  |  |  |  |  |  |
| Moser amd Dracup 2000      |  |  |  |  |  |  |  |  |  |
| Nezu et al 2013            |  |  |  |  |  |  |  |  |  |
| Northouse et al 2005       |  |  |  |  |  |  |  |  |  |
| Northouse et al 2007       |  |  |  |  |  |  |  |  |  |
| Northouse et al 2012       |  |  |  |  |  |  |  |  |  |
| Parssons and Anderson 2009 |  |  |  |  |  |  |  |  |  |
| Pelayo-Alvarez et al 2013  |  |  |  |  |  |  |  |  |  |
| Porter et al 2009          |  |  |  |  |  |  |  |  |  |
| Rodgers et al 1999         |  |  |  |  |  |  |  |  |  |

|                                                      |          |           |          |          |           |          |           |           |          |
|------------------------------------------------------|----------|-----------|----------|----------|-----------|----------|-----------|-----------|----------|
| Rudd et al 1997                                      |          |           |          |          |           |          |           |           |          |
| Ryan et al 2008                                      |          |           |          |          |           |          |           |           |          |
| Sabo et al 1986                                      |          |           |          |          |           |          |           |           |          |
| Schure et al 2006                                    |          |           |          |          |           |          |           |           |          |
| Scott et al 2004                                     |          |           |          |          |           |          |           |           |          |
| Shields et al 2004                                   |          |           |          |          |           |          |           |           |          |
| Smith et al 2004                                     |          |           |          |          |           |          |           |           |          |
| Scich et al 2002                                     |          |           |          |          |           |          |           |           |          |
| Teng et al 2003                                      |          |           |          |          |           |          |           |           |          |
| Thornton et al 2004                                  |          |           |          |          |           |          |           |           |          |
| Toselan et al 1995                                   |          |           |          |          |           |          |           |           |          |
| Van den Heuvel 2000 and<br>Van den Heuvel et al 2002 |          |           |          |          |           |          |           |           |          |
| Walsh 2007                                           |          |           |          |          |           |          |           |           |          |
| Walsh and Smidt 2003                                 |          |           |          |          |           |          |           |           |          |
| Wells et al 2003                                     |          |           |          |          |           |          |           |           |          |
| Witkowski and Carlsson<br>2014                       |          |           |          |          |           |          |           |           |          |
| <b>Totals n=103 studies</b>                          | <b>7</b> | <b>96</b> | <b>8</b> | <b>9</b> | <b>40</b> | <b>4</b> | <b>14</b> | <b>15</b> | <b>7</b> |

#### 4. Summary of papers included and excluded from each systematic review

##### Northouse et al (2010)

| Study                  | Description                                                                                                                                                                                | Included | Excluded                                                      |
|------------------------|--------------------------------------------------------------------------------------------------------------------------------------------------------------------------------------------|----------|---------------------------------------------------------------|
| Badger et al 2007      | Emphasis on improving communication between partners<br>Telephone-delivered psychosocial interventions and effect on depression and anxiety in women with breast cancer and their partners | No       | Not end of life care                                          |
| Baucom 2009            | Couple based intervention for women with breast cancer                                                                                                                                     | No       | Psycho-therapeutic approach<br>Cognitive behavioural approach |
| Blanchard et al 1996   | Problem solving intervention with spouses of cancer patients                                                                                                                               | No       | Not end of life care                                          |
| Budin et al 2008       | Intervention focused on breast cancer, education, counselling and adjustment                                                                                                               | No       | Not end of life care                                          |
| Bultz et al 2000       | Brief psychoeducational intervention support group for partners of early stage breast cancer                                                                                               | No       | Not end of life care                                          |
| Campbell et al 2007    | Focus on how African-American men cope with prostate cancer. Pilot study                                                                                                                   | No       | Not end of life care                                          |
| Carter (2006)          | Focus on sleep problems of family caregivers                                                                                                                                               | No       | Not end of life care                                          |
| Christensen 1983       | Breast cancer counselling following mastectomy                                                                                                                                             | No       | Not end of life care                                          |
| Derdiarain 1989        | Effects of information on recently diagnosed cancer patients' and spouses' satisfaction with care                                                                                          | No       | Not end of life care                                          |
| Giarelli 2003          | Caring for a spouse after prostate cancer, preparedness of wives                                                                                                                           | No       | Not end of life care                                          |
| Given 2006             | Impact of symptom management assistance on caregiver reaction                                                                                                                              | No       | Psycho-therapeutic approach<br>Cognitive behavioural approach |
| Goldberg and Wool 1985 | Psychotherapy for the spouses of lung cancer patients                                                                                                                                      | No       | Psycho-therapeutic approach<br>Grief therapy                  |

|                         |                                                                                                                                            |     |                                                               |
|-------------------------|--------------------------------------------------------------------------------------------------------------------------------------------|-----|---------------------------------------------------------------|
| Heinrich and Schag 1985 | Stress and activity management group treatment for cancer patients and spouses                                                             | No  | Psycho-therapeutic approach<br>Cognitive behavioural approach |
| Hudson 2005             | Psycho-educational intervention for family caregivers receiving palliative care                                                            | Yes |                                                               |
| Jepson 1999             | Effects of home care on caregivers' psychosocial status                                                                                    | No  | Not end of life care                                          |
| Keefe et al             | Partner-guided pain management at the end of life                                                                                          | No  | Focused on pain management                                    |
| Kissane et al 2006      | Family-focused grief therapy on caregivers' bereavement outcomes                                                                           | No  | Psycho-therapeutic approach<br>Grief therapy                  |
| Kozachik 2001           | Improving depressive symptoms among caregivers of patients with cancer                                                                     | No  | Not end of life care                                          |
| Kuijer 2004             | Brief intervention for patients with cancer and their partners                                                                             | No  | Psycho-therapeutic approach<br>Cognitive behavioural approach |
| Kurtz 2005              | Patient/caregiver symptom control intervention and effects on depression in caregivers                                                     | No  | Psycho-therapeutic approach<br>Cognitive behavioural approach |
| Manne 2004              | Psychoeducational group intervention for wives of men with prostate cancer                                                                 | Yes |                                                               |
| McCorkle 1998           | Effects of home nursing care for patients during terminal illness on bereavement                                                           | No  | Focused on impact of service                                  |
| McCorkle 2007           | Effects of advanced nursing on patient and spouse depressive symptoms, sexual function and marital interaction after radical prostatectomy | No  | Not end of life care                                          |
| McMillan et al 2006     | Coping skills intervention for family members of hospice patients                                                                          | Yes |                                                               |
| Mokuau 2008             | Development of a family intervention for native Hawaiian women with cancer                                                                 | No  | Not end of life care                                          |
| Northouse et al 2005    | To evaluate family intervention on quality of life with women with breast cancer and family caregivers                                     | Yes |                                                               |
| Northouse et al 2007    | Family intervention for prostate cancer patients and spouses                                                                               | Yes |                                                               |

|                  |                                                                                             |     |                      |
|------------------|---------------------------------------------------------------------------------------------|-----|----------------------|
| Scott et al 2004 | Couple-coping intervention on adjustment in early stage breast or gynaecological cancer     | No  | Not end of life care |
| Walsh 2007       | Reducing emotional distress in people caring for those receiving specialist palliative care | Yes |                      |

**Regan et al (2012)**

| Study               | Description                                                                                                                                                                                | Included | Excluded                                                 |
|---------------------|--------------------------------------------------------------------------------------------------------------------------------------------------------------------------------------------|----------|----------------------------------------------------------|
| Badger et al 2007   | Emphasis on improving communication between partners<br>Telephone-delivered psychosocial interventions and effect on depression and anxiety of women with breast cancer and their partners | No       | Not end of life care                                     |
| Badger et al 2010   | To test effectiveness of two telephone-delivered psychosocial interventions on QOL of men with prostate cancer and their intimate partners                                                 | No       | Not end of life care                                     |
| McCorkle et al 2007 | To examine effects of intervention on patient and spouse depressive symptoms sexual function and marital interaction                                                                       | No       | Not end of life care                                     |
| McLean et al 2011   | To examine effect of emotionally focused therapy in advanced cancer (metastatic disease) on marital functioning and psychosocial outcomes in distressed couples                            | No       | Psycho-therapeutic approach<br>Delivered by psychologist |
| Nezu et al 2003     | To examine the efficacy of problem-solving therapy on psychological distress                                                                                                               | No       | Not end of life care                                     |
| Kuijjer et al 2004  | To examine brief counselling intervention to couples – focused on social support and help both partners restoring perceptions of equity                                                    | No       | Not end of life care                                     |
| Porter et al 2009   | To test efficacy of partner-assisted emotional disclosure intervention                                                                                                                     | No       | Not end of life care                                     |
| Thornton et al 2004 | To test efficacy of a single-session psychological intervention integrated within pre-surgical treatment for prostate cancer                                                               | No       | Not end of life care                                     |
| Donnelly et al 2000 | Explored feasibility of interpersonal psychotherapy by telephone to reduce distress                                                                                                        | No       | Not end of life care<br>Delivered by psychologist        |
| Manne and Badr 2008 | Intimacy-enhancing intervention for breast cancer patients and their partners                                                                                                              | No       | Not end of life care                                     |

|                      |                                                                                                                                                                                                                                                                                                                                                                                                                                                                                                                                                      |     |                                                                              |
|----------------------|------------------------------------------------------------------------------------------------------------------------------------------------------------------------------------------------------------------------------------------------------------------------------------------------------------------------------------------------------------------------------------------------------------------------------------------------------------------------------------------------------------------------------------------------------|-----|------------------------------------------------------------------------------|
| McLean et al 2008    | To evaluate effectiveness of couples' intervention in improving marital function using emotionally focused couples' therapy.                                                                                                                                                                                                                                                                                                                                                                                                                         | No  | Psychotherapeutic approach<br>Delivered by psychologists                     |
| Mohr et al 2003      | Couples therapy at the end of life, prognosis less than 18months                                                                                                                                                                                                                                                                                                                                                                                                                                                                                     | No  | Psycho-therapeutic approach<br>Delivered by psychologists and social workers |
| Shields et al 2004   | Focus on coping with breast cancer survivors and spouses                                                                                                                                                                                                                                                                                                                                                                                                                                                                                             | No  | Not end of life care                                                         |
| Scott et al 2004     | To evaluate an intervention focused on coping and adjustment to early stage breast cancer                                                                                                                                                                                                                                                                                                                                                                                                                                                            | No  | Not end of life care                                                         |
| Northouse et al 2005 | To evaluate family intervention on quality of life with women with breast cancer and family caregivers                                                                                                                                                                                                                                                                                                                                                                                                                                               | Yes |                                                                              |
| Northouse et al 2007 | RCT family intervention for prostate cancer patients and spouses                                                                                                                                                                                                                                                                                                                                                                                                                                                                                     | Yes |                                                                              |
| Kayser et al 2010    | To determine the effectiveness of couple-based intervention on QOL of early stage breast cancer patients and partners                                                                                                                                                                                                                                                                                                                                                                                                                                | No  | Not end of life care                                                         |
| Northouse et al 2012 | To test dose of intervention needed for benefit using FOCUS intervention. Intervention delivered by master prepared nurses during three-month intervals. Usually FOCUS consists of three contacts (2 60 min home visits and a 30 min telephone call. Brief programme condensed in 3.5 hours. Extensive programme was 7 hours both 10 weeks in duration. Training of nurses 40 hours in length<br>N=848 dyads completed baseline; n=343 time 2 assessments<br>No difference between brief and extended interventions – enhanced coping in both groups | No  | Methodological focus on dose effectiveness                                   |
| Campbell et al 2007  | Focus on how African-American men cope with prostate cancer. Pilot study                                                                                                                                                                                                                                                                                                                                                                                                                                                                             | No  | Not end of life care                                                         |

|                      |                                                                                                                                                           |    |                      |
|----------------------|-----------------------------------------------------------------------------------------------------------------------------------------------------------|----|----------------------|
| Kozachick et al 2001 | To test impact of 16-week supportive nursing intervention on caregivers of patients with newly diagnosed cancer                                           | No | Not end of life care |
| Kurtz et al 2005     | To test nursing intervention aimed at teaching cancer patients and their caregivers about symptom management in people with newly diagnosed solid tumours | No | Not end of life care |
| McCorkle et al 2007  | To assess effects of advanced nursing practice on patient and spouse depression, sexual function, marital interaction following radical prostatectomy     | No | Not end of life care |
| Budin et al 2008     | RCT to test psychoeducation and telephone counselling on adjustment of women with breast cancer and their partners                                        | No | Not end of life care |



**Waldron et al (2013)**

| <b>Study</b>         | <b>Description</b>                                                                                     | <b>Included</b> | <b>Excluded</b>      |
|----------------------|--------------------------------------------------------------------------------------------------------|-----------------|----------------------|
| Campbell et al 2007  | Focus on how African-American men cope with prostate cancer. Pilot study                               | No              | Not end of life care |
| Carter (2006)        | Focus on reported sleep problems of family caregivers                                                  | No              | Not end of life care |
| McMillan et al 2006  | Coping skills intervention family members of hospice patients                                          | Yes             |                      |
| Northouse et al 2005 | To evaluate family intervention on quality of life with women with breast cancer and family caregivers | Yes             |                      |
| Northouse et al 2007 | RCT family intervention for prostate cancer patients and spouses                                       | Yes             |                      |
| Walsh et al 2007     | Reduction emotional distress in carers of those receiving palliative care                              | Yes             |                      |

**Candy et al (2011)**

| <b>Study</b>         | <b>Description</b>                                                                                     | <b>Included</b> | <b>Excluded</b>                                           |
|----------------------|--------------------------------------------------------------------------------------------------------|-----------------|-----------------------------------------------------------|
| Addington-Hall 1992  | Controlled trial of co-ordinating care for terminally ill cancer patients                              | No              | Not caregiver focused                                     |
| Allen 2008           | Controlled trial of legacy activities such as scrapbooking and audio stories                           | No              | Psycho-therapeutic approach<br>Life review and grief work |
| Carter (2006)        | Focus on reported sleep problems of family caregivers                                                  | No              | Not end of life care                                      |
| Hudson 2005          |                                                                                                        | Yes             |                                                           |
| Kane 1984            | Controlled trial of hospice care                                                                       | No              | Focused on service evaluation                             |
| Keefe 2005           |                                                                                                        | No              | Focused on pain control                                   |
| Kissane 2006         |                                                                                                        | No              | Psycho-therapeutic approach<br>Grief therapy              |
| McMillan et al 2006  | Coping skills intervention for family members of hospice patients                                      | Yes             |                                                           |
| Northouse et al 2005 | To evaluate family intervention on quality of life with women with breast cancer and family caregivers | Yes             |                                                           |
| Northouse et al 2007 | RCT family intervention for prostate cancer patients and spouses                                       | Yes             |                                                           |
| Walsh et al 2007     | Reduction emotional distress in carers of those receiving palliative care                              | Yes             |                                                           |

**Nevis (2014)**

| Study                     | Description                                                                            | Included | Excluded                                      |
|---------------------------|----------------------------------------------------------------------------------------|----------|-----------------------------------------------|
| Pelayo-Alvarez et al 2013 | Clinical effectiveness of an on-line training programme for palliative care physicians | No       | Other focus - training physicians             |
| Curtis et al 2013         | Effect of training skills training for residents and nurse practitioners               | No       | Other focus - communication skills training   |
| Curtis et al 2011         | Effect of a quality-improvement intervention on end of life care in intensive care     | No       | Focused on service development                |
| Meyers et al 2011         | Effects of COPE on QOL for patients with advanced cancer and their family caregivers   | No       | Other focus - participants in clinical trials |
| Bakitas et al 2009        | Effects of ENABLE II on clinical outcomes in patients with advanced cancer             | No       | Not caregiver focused                         |
| McMillan et al 2006       | Coping skills intervention for family members of hospice patients                      | Yes      |                                               |

**Harding et al (2012)**

| Study                | Description                                                                                                                                                                                                                                                                        | Included | Excluded                                                                                                                                                            |
|----------------------|------------------------------------------------------------------------------------------------------------------------------------------------------------------------------------------------------------------------------------------------------------------------------------|----------|---------------------------------------------------------------------------------------------------------------------------------------------------------------------|
| Cameron et al 2004   | To enhance problem solving abilities of carers and confidence in their role                                                                                                                                                                                                        | No       | Graded as weak evidence by reviewers                                                                                                                                |
| Hudson et al 2009    | Evaluation of benefits of MDT guidelines in family meetings. Meetings were led by nurses, trained to use the guidelines. Family concerns assessed pre and post meeting. The family meetings significantly reduced carers worry, and their concerns interfered less with their life | No       | Graded as weak evidence by reviewers<br><br>Learning point: Helpful study re focus on family member concerns and influence of a nurse-led meeting on these concerns |
| Hudson et al 2005    | Psycho-educational intervention for family caregivers receiving palliative care                                                                                                                                                                                                    | Yes      |                                                                                                                                                                     |
| Milberg et al 2005   | To enhance support and knowledge – individualised intervention provided by specialist nurses                                                                                                                                                                                       | No       | Graded as weak evidence by reviewers                                                                                                                                |
| Walsh and Smidt 2003 | Telecare intervention for carers of hospice patients - pilot study                                                                                                                                                                                                                 | No       | Graded as weak evidence by reviewers                                                                                                                                |
| Walsh et al 2007     | Focus on reducing emotional distress in carers of those receiving palliative care                                                                                                                                                                                                  | Yes      |                                                                                                                                                                     |
| Carter (2006)        | Focus on reported sleep problems of family caregivers                                                                                                                                                                                                                              | No       | Not end of life                                                                                                                                                     |
| Ryan et al 2008      | Non-clinical community based social support for carers of people with lung cancer                                                                                                                                                                                                  | No       | Graded as weak evidence by reviewers                                                                                                                                |

|                              |                                                                                                               |     |                                                                          |
|------------------------------|---------------------------------------------------------------------------------------------------------------|-----|--------------------------------------------------------------------------|
| Magill 2009                  | Home based palliative care music therapy, effect of providing before bereavement on post-bereavement outcomes | No  | Other focus - music therapy                                              |
| Northouse et al 2007         | RCT family intervention for prostate cancer patients and spouses                                              | Yes |                                                                          |
| Allen et al 2008             | Family-based intervention to reduce caregiving stress                                                         | No  | Psycho-therapeutic approach<br>Life review and grief work                |
| Northouse et al 2005         | To evaluate family intervention on quality of life with women with breast cancer and family caregivers        | Yes |                                                                          |
| Christakis and Iwashyna 2003 | To evaluate spouse mortality after bereavement, large matched retrospective cohort study                      | No  | Focused on service                                                       |
| Kirk and Collins 2006        | Evaluation of hospital palliative care team in Africa                                                         | No  | Focused on service                                                       |
| Kusajima 2009                | Evaluation of the transition to specialist home palliative care – prospective pre and post evaluation         | No  | Focused on service                                                       |
| Grande et al 2004            | RCT hospice at home service                                                                                   | No  | Focused on service                                                       |
| McLaughlin et al 2007        | Evaluation of a hospice at home service                                                                       | No  | Focused on service                                                       |
| Clayton et al 2007           | RCT Evaluation of question prompt training for patients and caregivers                                        | No  | Other focus - training patients and caregivers to optimise consultations |
| Hendrix et al 2009           | Evaluation of training for patients and caregivers in symptom management                                      | No  | Focused on symptom management                                            |
| Dobrof et al 2006            | Retrospective evaluation of social work provision                                                             | No  | Focused on service                                                       |
| Barrett et al 2009           | Evaluation of an at-home respite service                                                                      | No  | Focused on service                                                       |
| McMillan et al 2006          | Coping skills intervention family members of hospice patients                                                 | Yes |                                                                          |

|                             |                                                                                                                                                                                                                                                                                    |    |                                                                                                                                                                     |
|-----------------------------|------------------------------------------------------------------------------------------------------------------------------------------------------------------------------------------------------------------------------------------------------------------------------------|----|---------------------------------------------------------------------------------------------------------------------------------------------------------------------|
| Parsons and Anderson 2009   | Ethnographic interview study of afternoon tea sessions for patients and families on a palliative care unit                                                                                                                                                                         | No | Focused on service                                                                                                                                                  |
| Cohen and Kuten 2006        | Comparison between group support, intervention group used Cognitive behavioural therapy                                                                                                                                                                                            | No | Psycho-therapeutic approach<br>Cognitive behavioural approach                                                                                                       |
| Witkowski and Carlsson 2014 | Phenomenological study of group support session                                                                                                                                                                                                                                    | No | Focused on service                                                                                                                                                  |
| Kwak et al 2007             | Evaluation of a caregiver training programme                                                                                                                                                                                                                                       | No | Other focus – caregiver training                                                                                                                                    |
| Arnaert 2010                | Evaluation of a weekend retreat for caregivers                                                                                                                                                                                                                                     | No | Focused on service                                                                                                                                                  |
| Hudson et al 2008           | Pre- and post-evaluation of a 3-week group psychoeducational intervention for preparation of caregivers                                                                                                                                                                            | No | Other focus – caregiver training                                                                                                                                    |
| Hudson et al 2009           | Evaluation of benefits of MDT guidelines in family meetings. Meetings were led by nurses, trained to use the guidelines. Family concerns assessed pre and post meeting. The family meetings significantly reduced carers worry, and their concerns interfered less with their life | No | Graded as weak evidence by reviewers<br><br>Learning point: Helpful study re focus on family member concerns and influence of a nurse-led meeting on these concerns |
| Clark et al 2006            | Evaluation of an 8 session structured MDT intervention for cancer patients designed to improve carer's burden and QOL                                                                                                                                                              | No | Not caregiver focused                                                                                                                                               |
| McDonald et al 2006         | Evaluation of a 12-week hospice yoga programme for patients                                                                                                                                                                                                                        | No | Not caregiver focused                                                                                                                                               |

**Chambers et al 2011** – studies included in review identified as addressing caregiver needs

| Study                | Description                                                                                                                                | Included | Excluded                            |
|----------------------|--------------------------------------------------------------------------------------------------------------------------------------------|----------|-------------------------------------|
| Campbell et al 2007  | Focus on how African-American men cope with prostate cancer. Pilot study                                                                   | No       | Not end of life care                |
| Canada et al 2005    | Pilot intervention to enhance couple sexual rehabilitation following treatment for prostate cancer                                         | No       | Other focus - sexual rehabilitation |
| Manne 2004           | Psychoeducational group intervention for wives of men with prostate cancer                                                                 | Yes      |                                     |
| McCorkle 2007        | Effects of advanced nursing on patient and spouse depressive symptoms, sexual function and marital interaction after radical prostatectomy | No       | Not end of life care                |
| Northouse et al 2007 | RCT family intervention for prostate cancer patients and spouses                                                                           | Yes      |                                     |

**Caress et al (2009)** studies identified as focused on symptom management excluded (n=10)

| Study                                          | Description                                                                                                                      | Included | Excluded                                                                                                                                                                                                                                                                             |
|------------------------------------------------|----------------------------------------------------------------------------------------------------------------------------------|----------|--------------------------------------------------------------------------------------------------------------------------------------------------------------------------------------------------------------------------------------------------------------------------------------|
| McCorkle et al 2007                            | To examine effects of specialised home care intervention on survival of older post-surgical patients                             | No       | Not end of life care                                                                                                                                                                                                                                                                 |
| Cameron et al 2004                             | To enhance problem solving abilities of carers and confidence in their role                                                      | No       | Graded as weak evidence by Harding et al 2012 and Ussher et al 2009                                                                                                                                                                                                                  |
| Kozachick et al 2001                           | To test impact of 16-week supportive nursing intervention on caregivers of patients with newly diagnosed cancer                  | No       | Not end of life care                                                                                                                                                                                                                                                                 |
| McMillan and Small 2007<br>McMillan et al 2006 | Coping skills intervention family members of hospice patients                                                                    | Yes      |                                                                                                                                                                                                                                                                                      |
| Nezu et al 2003                                | To examine the efficacy of problem-solving therapy on psychological distress                                                     | No       | Not end of life care                                                                                                                                                                                                                                                                 |
| Toselan et al 1995                             | <b>Evaluation of a problem-solving intervention provided over 6 x 1hour sessions RCT, provided by an oncology social worker.</b> | No       | Not end of life care<br><br>Learning points: steps in the Problem-solving model included:<br>Identifying the problem<br>Generating alternative solutions<br>Examining the benefits and drawbacks of each solution<br>Discussing and rehearsing an action plan<br>Evaluating the plan |
| Harding et al 2004                             | Evaluation of teaching programme for carers of people receiving home-based palliative care                                       | No       | Other focus - teaching programme                                                                                                                                                                                                                                                     |



|                   |                                                                                                        |     |                                      |
|-------------------|--------------------------------------------------------------------------------------------------------|-----|--------------------------------------|
| Hudson 2005       | Psycho-educational intervention for family caregivers receiving palliative care                        | Yes |                                      |
| Hudson et al 2008 | Evaluation of a psycho-educational group programme for family caregivers in home-based palliative care | No  | Graded as weak evidence by reviewers |
| Walsh 2007        | Reducing emotional distress in people caring receiving specialist palliative care                      | Yes |                                      |

**Ussher et al 2009**

| Study                | Description                                                                                                                                                                                                                                                                                                                                                          | Included | Excluded                                    |
|----------------------|----------------------------------------------------------------------------------------------------------------------------------------------------------------------------------------------------------------------------------------------------------------------------------------------------------------------------------------------------------------------|----------|---------------------------------------------|
| Christensen 1983     | Breast cancer counselling following mastectomy                                                                                                                                                                                                                                                                                                                       | No       | Not end of life care                        |
| Kissane et al 2006   | Family-focused grief therapy on caregivers bereavement outcomes                                                                                                                                                                                                                                                                                                      | No       | Psychotherapeutic approach<br>Grief therapy |
| Blanchard et al 1996 | Problem solving intervention with spouses of cancer patients                                                                                                                                                                                                                                                                                                         | No       | Not end of life care                        |
| Bultz et al 2000     | Brief psychoeducational intervention support group for partners of early stage breast cancer                                                                                                                                                                                                                                                                         | No       | Not end of life care                        |
| Walsh et al 2007     | Reduction emotional distress in carers of those receiving palliative care                                                                                                                                                                                                                                                                                            | Yes      |                                             |
| Toselan et al 1995   | Evaluation of a problem-solving intervention provided over 6 x 1hour sessions RCT, provided by an oncology social worker.<br>Steps in the Problem-solving model included:<br>Identifying the problem<br>Generating alternative solutions<br>Examining the benefits and drawbacks of each solution<br>Discussing and rehearsing an action plan<br>Evaluating the plan | No       | Not end of life care                        |
| Northouse et al 2005 | To evaluate family intervention on quality of life with women with breast cancer and family caregivers                                                                                                                                                                                                                                                               | Yes      |                                             |

|                         |                                                                                                                                         |     |                                                              |
|-------------------------|-----------------------------------------------------------------------------------------------------------------------------------------|-----|--------------------------------------------------------------|
| Scott et al 2004        | To evaluate an intervention focused on coping and adjustment to early stage breast cancer                                               | No  | Not end of life care                                         |
| Hudson 2005             | Psycho-educational intervention for family caregivers receiving palliative care                                                         | Yes |                                                              |
| Kozachick et al 2001    | To test impact of 16-week supportive nursing intervention on caregivers of patients with newly diagnosed cancer                         | No  | Not end of life care                                         |
| Goldberg and Wool 1985  | Psychotherapy for the spouses of lung cancer patients                                                                                   | No  | Psychotherapeutic approach<br>Grief therapy                  |
| Kuijer et al 2004       | To examine brief counselling intervention to couples – focused on social support and help both partners restoring perceptions of equity | No  | Not end of life care                                         |
| Kayser 2005             | Couple psychosocial intervention over 9 sessions RCT for women with breast cancer currently receiving treatment and their partners      | No  | Not end of life care                                         |
| McCorkle 1998           | The effects of home nursing care for patients during terminal illness on bereavement                                                    | No  | Focused on service                                           |
| Heinrich and Schag 1985 | Stress and activity management group treatment for cancer patients and spouses                                                          | No  | Psychotherapeutic approach<br>Cognitive behavioural approach |
| Gagnon et al 2002       | Psychoeducation re. delirium                                                                                                            | No  | Focused on symptom management                                |
| Sabo et al 1986         | Evaluation of facilitated support group for men following partner treatment with mastectomy for breast cancer                           | No  | Not end of life care                                         |

**Glasdam et al 2010**

| Study                                             | Description                                                                                                                                                                 | Included | Excluded             |
|---------------------------------------------------|-----------------------------------------------------------------------------------------------------------------------------------------------------------------------------|----------|----------------------|
| Anderson et al 2000                               | Comparison of home or hospital rehabilitation therapy following stroke                                                                                                      | No       | Focused on service   |
| Clark et al 2003                                  | RCT evaluating whether education and counselling following stroke influenced physical functioning and social outcomes                                                       | No       | Not end of life care |
| Dennis et al 1997                                 | Evaluation of a stroke family worker                                                                                                                                        | No       | Focused on service   |
| Goldberg et al 1997                               | Evaluation of home-based case-managed care for stroke survivors                                                                                                             | No       | Not end of life care |
| Grant 1999                                        | Pilot study comparison of effectiveness of home and telephone social problem-solving partnerships on family carer outcomes and influence of stroke survivor characteristics | No       | Not end of life care |
| Grant et al 2002                                  | Evaluation of a telephone support intervention with caregivers of stroke survivors                                                                                          | No       | Not end of life care |
| Van den Heuvel 2000 and Van den Heuvel et al 2002 | Evaluation of an exercise programme vs education home visits vs no intervention                                                                                             | No       | Not end of life care |
| Holmquist et al 2000                              | Comparison of home rehabilitation group vs hospital rehabilitation                                                                                                          | No       | Not end of life care |
| Kotila et al 1998                                 | Incidence of depression after stroke                                                                                                                                        | No       | Not end of life care |
| Lincoln et al 2003                                | Evaluation of a stroke family support organizer                                                                                                                             | No       | Focused on service   |

|                                |                                                                                                                   |    |                                                              |
|--------------------------------|-------------------------------------------------------------------------------------------------------------------|----|--------------------------------------------------------------|
| Mant et al 1998                | RCT of impact of information pack on family members of people recovering from stroke                              | No | Not end of life care                                         |
| Mant et al 2005                | One year follow up of RCT above                                                                                   | No | Not end of life care                                         |
| McKinney et al 2002            | Evaluation of cognitive assessment in stroke                                                                      | No | Not end of life care                                         |
| Rodgers et al 1999             | Randomised trial of a stroke education programme                                                                  | No | Not end of life care                                         |
| Rudd et al 1997                | RCT evaluation of early discharge for people following stroke                                                     | No | Not focused on caregivers                                    |
| Schure et al 2006              | Evaluation of group support vs home visiting programme following method outlined by Van den Heuvel                | No | Not end of life care                                         |
| Smith et al 2004               | Evaluation of a stroke recovery programme                                                                         | No | Not focused on end of life care                              |
| Sulch et al 2002               | Impact of integrated care pathway on quality of life for stroke                                                   | No | Not focused on caregivers                                    |
| Teng et al 2003                | Evaluation of home education group vs standard discharge and follow up re costs for caregivers of early discharge | No | Not focused on end of life care                              |
| Bultz et al 2000               | Brief psychoeducational intervention support group for partners of early stage breast cancer                      | No | Not end of life care specific                                |
| Cohen and Kuten 2006           | Comparison between group support, intervention group used CBT                                                     | No | Psychotherapeutic approach<br>Cognitive behavioural approach |
| Given 2006<br>Kurtz et al 2005 | Impact of symptom management assistance on caregiver reaction RCT                                                 | No | Cognitive behavioural approach                               |
| Hoff and Haaga 2005            | Effect of an education programme on radiation oncology patients and families                                      | No | Not end of life care                                         |
| Kozachick et al 2001           | To test impact of 16-week supportive nursing intervention on                                                      | No | Not end of life care                                         |

|                       |                                                                                                                                                                  |     |                              |
|-----------------------|------------------------------------------------------------------------------------------------------------------------------------------------------------------|-----|------------------------------|
|                       | caregivers of patients with newly diagnosed cancer                                                                                                               |     |                              |
| Kuijer et al 2004     | To examine brief counselling intervention to couples – focused on social support to help both partners restore perceptions of equity                             | No  | Not end of life care         |
| Lin et al 2006        | Evaluation of long-term effectiveness of family and patient pain education programme                                                                             | No  | Not end of life care         |
| Northouse et al 2005  | To evaluate family intervention on quality of life with women with breast cancer and family caregivers                                                           | Yes |                              |
| Scott et al 2004      | To evaluate an intervention focused on coping and adjustment to early stage breast cancer                                                                        | No  | Not end of life care         |
| Wells et al 2003      | Education to improve pain management for patients and caregivers                                                                                                 | No  | Not end of life care         |
| Bull et al 2000       | To examine differences in outcomes for elders and caregivers who participated in a professional - partnership model of discharge for patients with heart failure | No  | Not end of life care         |
| Mahler and Kulik 2002 | Evaluation of videotaped information on spousal distress following surgery                                                                                       | No  | Not end of life care         |
| Moser and Dracup 2000 | Evaluation of group education about resuscitation                                                                                                                | No  | Other focus - training needs |

### Hudson et al 2010

| Study               | Description                                                                                                                                                                                                                                                                        | Included | Excluded                                                                                                                                                            |
|---------------------|------------------------------------------------------------------------------------------------------------------------------------------------------------------------------------------------------------------------------------------------------------------------------------|----------|---------------------------------------------------------------------------------------------------------------------------------------------------------------------|
| McMillan et al 2006 | Coping skills intervention family members of hospice patients                                                                                                                                                                                                                      | Yes      |                                                                                                                                                                     |
| Hudson 2005         | Psycho-educational intervention for family caregivers receiving palliative care                                                                                                                                                                                                    | Yes      |                                                                                                                                                                     |
| Walsh et al 2007    | Reduction emotional distress in carers of those receiving palliative care                                                                                                                                                                                                          | Yes      |                                                                                                                                                                     |
| Keefe 2005          |                                                                                                                                                                                                                                                                                    | No       | Focused on pain control                                                                                                                                             |
| Haley 2008          |                                                                                                                                                                                                                                                                                    | No       | Not end of life care                                                                                                                                                |
| Harding et al 2004  | Evaluation of teaching programme for carers of people receiving home-based palliative care                                                                                                                                                                                         | No       | Graded as weak evidence by reviewers                                                                                                                                |
| Hudson et al 2008   | Pre- and post-evaluation of a 3-week group psychoeducational intervention for preparation of caregivers                                                                                                                                                                            | No       | Graded as weak evidence by reviewers                                                                                                                                |
| Hudson et al 2009   | Evaluation of benefits of MDT guidelines in family meetings. Meetings were led by nurses, trained to use the guidelines. Family concerns assessed pre and post meeting. The family meetings significantly reduced carers worry, and their concerns interfered less with their life | No       | Graded as weak evidence by reviewers<br><br>Learning point: helpful study re focus on family member concerns and influence of a nurse-led meeting on these concerns |
| Carter (2006)       | Focus on reported sleep problems of family caregivers                                                                                                                                                                                                                              | No       | Not end of life care<br>Graded as weak evidence by reviewers                                                                                                        |
| Kwak et al 2007     | Evaluation of a programme focusing on closure during end of life care                                                                                                                                                                                                              | No       | Graded as weak evidence by reviewers                                                                                                                                |

|                      |                                                                                              |    |                                                                |
|----------------------|----------------------------------------------------------------------------------------------|----|----------------------------------------------------------------|
| Duggleby et al 2007  | Development of a living hope programme for caregivers of family members with advanced cancer | No | Graded as weak evidence by reviewers                           |
| Walsh and Smidt 2003 | Telecare intervention for carers of hospice patients - pilot study                           | No | Graded as weak evidence by reviewers and by Harding et al 2012 |
| Milberg et al 2005   | To enhance support and knowledge – individualised intervention provided by specialist nurses | No | Graded as weak evidence by reviewers and by Harding et al 2012 |



6. Comparison of COPE and FOCUS from analysis of intervention manuals using checklist for summarising psychological interventions (Hodges et al 2011)

|                                                                                                                                                                                                                                                                                                                                                             | COPE (McMillan and colleagues)                                                                                                                                                                                                                                                                                                                                                                                                                                                                                                                                     | FOCUS (Northouse and colleagues)                                                                                                                                                                                                                                                                                                                                                                                       |
|-------------------------------------------------------------------------------------------------------------------------------------------------------------------------------------------------------------------------------------------------------------------------------------------------------------------------------------------------------------|--------------------------------------------------------------------------------------------------------------------------------------------------------------------------------------------------------------------------------------------------------------------------------------------------------------------------------------------------------------------------------------------------------------------------------------------------------------------------------------------------------------------------------------------------------------------|------------------------------------------------------------------------------------------------------------------------------------------------------------------------------------------------------------------------------------------------------------------------------------------------------------------------------------------------------------------------------------------------------------------------|
| <p><b>Context</b></p> <p><b>Indications:</b> Conditions under which the intervention was used (e.g. presence of diagnosis or symptoms)</p> <p><b>Population:</b> Inclusion and exclusion criteria for people receiving the intervention</p> <p><b>Location:</b> The geographical location and the type of service in which the intervention was tested.</p> | <p>Symptoms related to advanced cancer</p> <p>Family caregivers of people with advanced cancer (hospice)<br/>Inclusion (in trial) Adults, cancer, family caregiver, literate, cognitively intact</p> <p>South Florida Hospice Care</p>                                                                                                                                                                                                                                                                                                                             | <p>Coping with prostate cancer<br/>Couples as an emotional system</p> <p>Men and family members with prostate cancer at all stages of illness<br/>Later studies (than that reported in manual) have used FOCUS with people with breast cancer and advanced cancer<br/>Age above 30yrs, partner age above 21</p> <p>Home, US</p>                                                                                        |
| <p><b>Domain 1 Intervention content</b></p> <p><b>Components</b></p> <p><b>Techniques</b></p> <p><b>Treatment Materials</b></p> <p><b>Tailoring to individual patients</b></p>                                                                                                                                                                              | <p>Components: Creativity; Optimism; Planning and Expert Information</p> <p>Treatment materials: caregiving guide (how to manage 23 common symptoms) available - <a href="http://www.cancer.org/treatment/treatmentsandsideeffects/physicalsideeffects/dealingwithsymptomsathome/caring-for-the-patient-with-cancer-at-home-intro">http://www.cancer.org/treatment/treatmentsandsideeffects/physicalsideeffects/dealingwithsymptomsathome/caring-for-the-patient-with-cancer-at-home-intro</a></p> <p>Tailoring by initial identification of issues of concern</p> | <p>Components: family involvement, optimistic attitude, coping effectiveness, uncertainty reduction, symptom management</p> <p>Treatment materials: various related to information and coping and symptom management – pt booklets, drug information sheets, symptom management sheets, relaxation audio tape</p> <p>Tailoring to issues of concern but intent to cover all issues identified in research protocol</p> |
| <b>Domain 2 Proposed mechanisms</b>                                                                                                                                                                                                                                                                                                                         |                                                                                                                                                                                                                                                                                                                                                                                                                                                                                                                                                                    |                                                                                                                                                                                                                                                                                                                                                                                                                        |

|                                                                                                                                                   |                                                                                                                                                                                                                                                                                                                                                                                                                                                                                                                                                                                                                                                                                                                        |                                                                                                                                                                                                                                         |
|---------------------------------------------------------------------------------------------------------------------------------------------------|------------------------------------------------------------------------------------------------------------------------------------------------------------------------------------------------------------------------------------------------------------------------------------------------------------------------------------------------------------------------------------------------------------------------------------------------------------------------------------------------------------------------------------------------------------------------------------------------------------------------------------------------------------------------------------------------------------------------|-----------------------------------------------------------------------------------------------------------------------------------------------------------------------------------------------------------------------------------------|
| <b>Mechanisms of action</b>                                                                                                                       | Enhanced problem solving<br>Use of expert practitioners to help solve problems                                                                                                                                                                                                                                                                                                                                                                                                                                                                                                                                                                                                                                         | Enhanced problem solving<br>Enhanced communication between patient and partner                                                                                                                                                          |
| <b>Domain 3 Target outcomes</b><br><b>Primary outcome</b><br><b>Secondary outcome</b>                                                             | Primary: Improved caregiver QOL, reduced caregiver distress from patient symptoms (MSAS-CG), coping (brief COPE)<br>Secondary: decreased patient symptom distress                                                                                                                                                                                                                                                                                                                                                                                                                                                                                                                                                      | Primary: reduced uncertainty for partner; enhanced communication between pt and partner<br>Secondary: increased QoL for partner; increased appraisal of ability as caregiver; increased self-efficacy; reduced symptom distress patient |
| <b>Domain 4 Method of delivery</b><br><b>Delivery setting and method</b><br><br><b>Timing of treatment</b><br><b>Therapist</b><br><b>Training</b> | Delivery face-to-face over 3 sessions in patient's home over 9 days<br>Session 1: 45mins; session 2: 30mins; session 3: 30mins<br>Hospice RN<br>8hrs training inclusive of instruction and role play plus 3 pilot interventions, audiotaped and assessed for fidelity                                                                                                                                                                                                                                                                                                                                                                                                                                                  | 3 structured 90 min visits face-to-face with telephone booster between visits of 30mins<br><br>40 hours training for master level RN's using training video, talks and shadowing experienced nurses                                     |
| Comments                                                                                                                                          | Prompts clear for intervention; topic discussion clear<br>Home care assistant looking after patient whilst nurse delivering intervention                                                                                                                                                                                                                                                                                                                                                                                                                                                                                                                                                                               |                                                                                                                                                                                                                                         |
| Reflections                                                                                                                                       | Long interventions in terms of time taken to deliver – several successive consultations<br>Later studies with FOCUS compared 30min interventions with standard length and found no difference in outcomes<br>Later study with COPE with people with heart failure did not replicate outcomes of previous studies – thought carer more experienced in issues related to illness so intervention might have been more helpful earlier in illness<br>Resource intensive<br>Both interventions focused on coping whilst at home<br>Focus tested in advanced cancer, similar results – also investigated risk for distress screening tool (omega clinical screening tool) but found all caregivers were at risk of distress |                                                                                                                                                                                                                                         |

Additional source:

McMillan [http://www.rosalynncarter.org/UserFiles/File/2009\\_asa\\_ncoa\\_conference/mcmillan.pdf](http://www.rosalynncarter.org/UserFiles/File/2009_asa_ncoa_conference/mcmillan.pdf)

COPE:

C: Creativity – viewing problems from different perspectives to develop new strategies for solving caregiving problems

O: Optimism – having a positive but realistic attitude toward solving the problem – includes communicating realistic optimism to patient, showing optimism and hope

P: Planning – setting out reasonable goals and the steps needed to reach goals

E: Expert Information – what caregivers need to know about a problem, when to get help and what they can do to help themselves manage the problem

## 7. Summary of analysis of papers included in evidence review

| Study             | Guiding framework                                                              | Inputs (resources)                             | Activities                                                                                                                                                                                                                                                                                                                                                                                                                                                                                                                     | Outputs<br>N=<br>Sample characteristics                                                                                                                           | Intermediate outcomes                                                                                                                                                                                   | Outcomes                                                      |
|-------------------|--------------------------------------------------------------------------------|------------------------------------------------|--------------------------------------------------------------------------------------------------------------------------------------------------------------------------------------------------------------------------------------------------------------------------------------------------------------------------------------------------------------------------------------------------------------------------------------------------------------------------------------------------------------------------------|-------------------------------------------------------------------------------------------------------------------------------------------------------------------|---------------------------------------------------------------------------------------------------------------------------------------------------------------------------------------------------------|---------------------------------------------------------------|
| Hudson et al 2005 | Lazarus and Folkman's transactional model of stress and coping                 | Nurse<br><br>Caregiver guidebook and audiotape | 2 home visits and one follow phone call<br><br>Provide opportunity to access information and provide basis for skill acquisition<br><br>Reinforcement role of p/c services and other services and providing strategies for involving family and friends<br><br>Helping caregiver find meaning in situation, normalising emotional reactions, encouraging them to see positive aspects of experience, offering spiritual guidance<br><br>Encouraging carer to take care of themselves<br><br>Providing advice on carer's rights | N=106; 54 received intervention; 52 received standard care<br><br>Mean age 60.78<br>67% women carers<br>Advanced cancer<br>Australian                             | Preparedness for caregiving<br><br>Perceived competence as caregiver<br><br>Perceived potential benefits of caring<br>Mastery (perceived control over events)<br><br>Psychological distress (HAD scale) | Increased satisfaction/Reward of caregiving                   |
| Manne et al 2004  | Lazarus Stress and Coping theory<br>Horowitz<br>Cognitive and social processes | Clinical experts related to session focus      | Group intervention consisting of 6 x 1 hour sessions, with a different topic for each session, plus homework after session 3 and 4 – sessions consisted of didactic and group contributions<br><br>Finding benefit and meaning in experience; how to recognise support                                                                                                                                                                                                                                                         | N=128 women married to men with prostate cancer approached, n=68 agreed to participate; final sample size n=60 – (n=7 dropped out) randomized into 2 groups, n=29 | Coping skills<br>Open communication and social support<br><br>Psychological distress (Mental Health Inventory and Impact Events Scale)                                                                  | Personal strength, spiritual growth and appreciation for life |

|                                                     |                                                    |       |                                                                                                                                                                                                                                                           |                                                                                                                                                                                                                                                                                                                                                                      |                                                                                                 |                         |
|-----------------------------------------------------|----------------------------------------------------|-------|-----------------------------------------------------------------------------------------------------------------------------------------------------------------------------------------------------------------------------------------------------------|----------------------------------------------------------------------------------------------------------------------------------------------------------------------------------------------------------------------------------------------------------------------------------------------------------------------------------------------------------------------|-------------------------------------------------------------------------------------------------|-------------------------|
|                                                     | theory of adaptation                               |       | needs and get these met; how to recognise support that is effective and ineffective; skills training in effective communication                                                                                                                           | intervention, 31 control group participants<br>Mean age 59.63 years                                                                                                                                                                                                                                                                                                  | Marital communication<br>Post traumatic Growth                                                  |                         |
| McMillan et al 2006<br>And McMillan and Small, 2007 | Implicit stress and coping therapy                 | Nurse | Usual hospice care + Problem-focused skills teaching with 4 components: Creativity; optimism; planning; lay info provision<br><br>COPE                                                                                                                    | N=354 eligible for participation; 329 randomized (3 armed RCT)<br>Intervention group: n=111; enhanced usual care: n=109; control group usual care: n=109<br>Large number of carers dropped out before programme completed<br>63-71% pt decline in health and carer feeling overwhelmed<br><br>Mean age approx. 60<br>Most female<br>Cancer, hospice programme<br>USA | Carer mastery<br>Burden<br>Burden of cancer symptoms                                            | QOL<br><br>Carer coping |
| Northouse 2005                                      | Stress appraisal model from Lazarus and colleagues | Nurse | 3 monthly visits around 1.5 hours long<br>Follow up telephone calls total 5 contacts<br><br>FOCUS ?intervention – information and support<br><br>5 components: promoting cohesive family; encouraging optimistic outlook; coping effectiveness; provision | 182 families of which 96 received intervention<br>134/182 follow up assessments completed; no difference in drop out between intervention and control group<br><br>Mean age 52<br>62% husbands                                                                                                                                                                       | Coping effectiveness<br>Hopelessness reduction<br>Reduction uncertainty<br>Appraisal of illness | QOL                     |

|                |                          |                                                                     |                                                                                      |                                                                                                                                                                                                                       |                                                                                                                                                                        |     |
|----------------|--------------------------|---------------------------------------------------------------------|--------------------------------------------------------------------------------------|-----------------------------------------------------------------------------------------------------------------------------------------------------------------------------------------------------------------------|------------------------------------------------------------------------------------------------------------------------------------------------------------------------|-----|
|                |                          |                                                                     | information to reduce uncertainty;<br>assist carer to manage symptoms                | Breast cancer                                                                                                                                                                                                         |                                                                                                                                                                        |     |
| Northouse 2007 | As above                 | Nurse                                                               | 3 x 90-minute home visits + 2 phone<br>calls 2 weeks apart<br><br>FOCUS intervention | 263 couples<br>84% Caucasian 14%<br>African Americans<br><br>Prostate cancer<br>Mean age 59<br><br>218/263 couples<br>completed all three<br>sessions, attrition due to<br>death of pt (15), business<br>of carer (6) | Functional Assessment<br>of Cancer (FACT-P)<br>Appraisal of illness<br>Appraisal of caregiving<br>Uncertainty<br>Hopelessness<br>Coping strategies<br>Symptom distress | QOL |
| Walsh 2007     | Not explicitly<br>stated | Trained advisors<br>– trained nurse<br>and trained<br>social worker | 6 weekly sessions<br>Specialist p/c of care by trained<br>advisors (intervention)    | 271<br><br>British<br>Mostly women n=215<br>Mean age 56.4<br>Cancer<br><br>54/72 completed follow<br>up intervention group<br>69/90 in control group                                                                  | Caregivers psychological<br>distress<br>Carer strain<br>Satisfaction with care                                                                                         | QOL |
